# Supplementary material for: First-Principles Studies on the Structural and Electronic Properties of As Clusters
Source: Materials (Basel). 2018 Sep 3;11(9):1596. doi: 10.3390/ma11091596 (PMC6163391; doi:10.3390/ma11091596)
Supplement: Supplementary file 1 [file materials-11-01596-s001.docx]

First-Principles Studies on the Structural and Electronic Properties of As Clusters

**Jialin Yan 1,2,3, Jingjing Xia 2, Qinfang Zhang 1,*, Binwen Zhang 1, and Baolin Wang 3,***

1 School of Materials Science and Engineering, Yancheng Institute of Technology, Yancheng 224051, P.R. China

2 College of Education Science，Nantong University, Nantong, 226019, P.R. China

3 School of Physical Science and Technology, Nanjing Normal University, Nanjing 210023, P.R. China


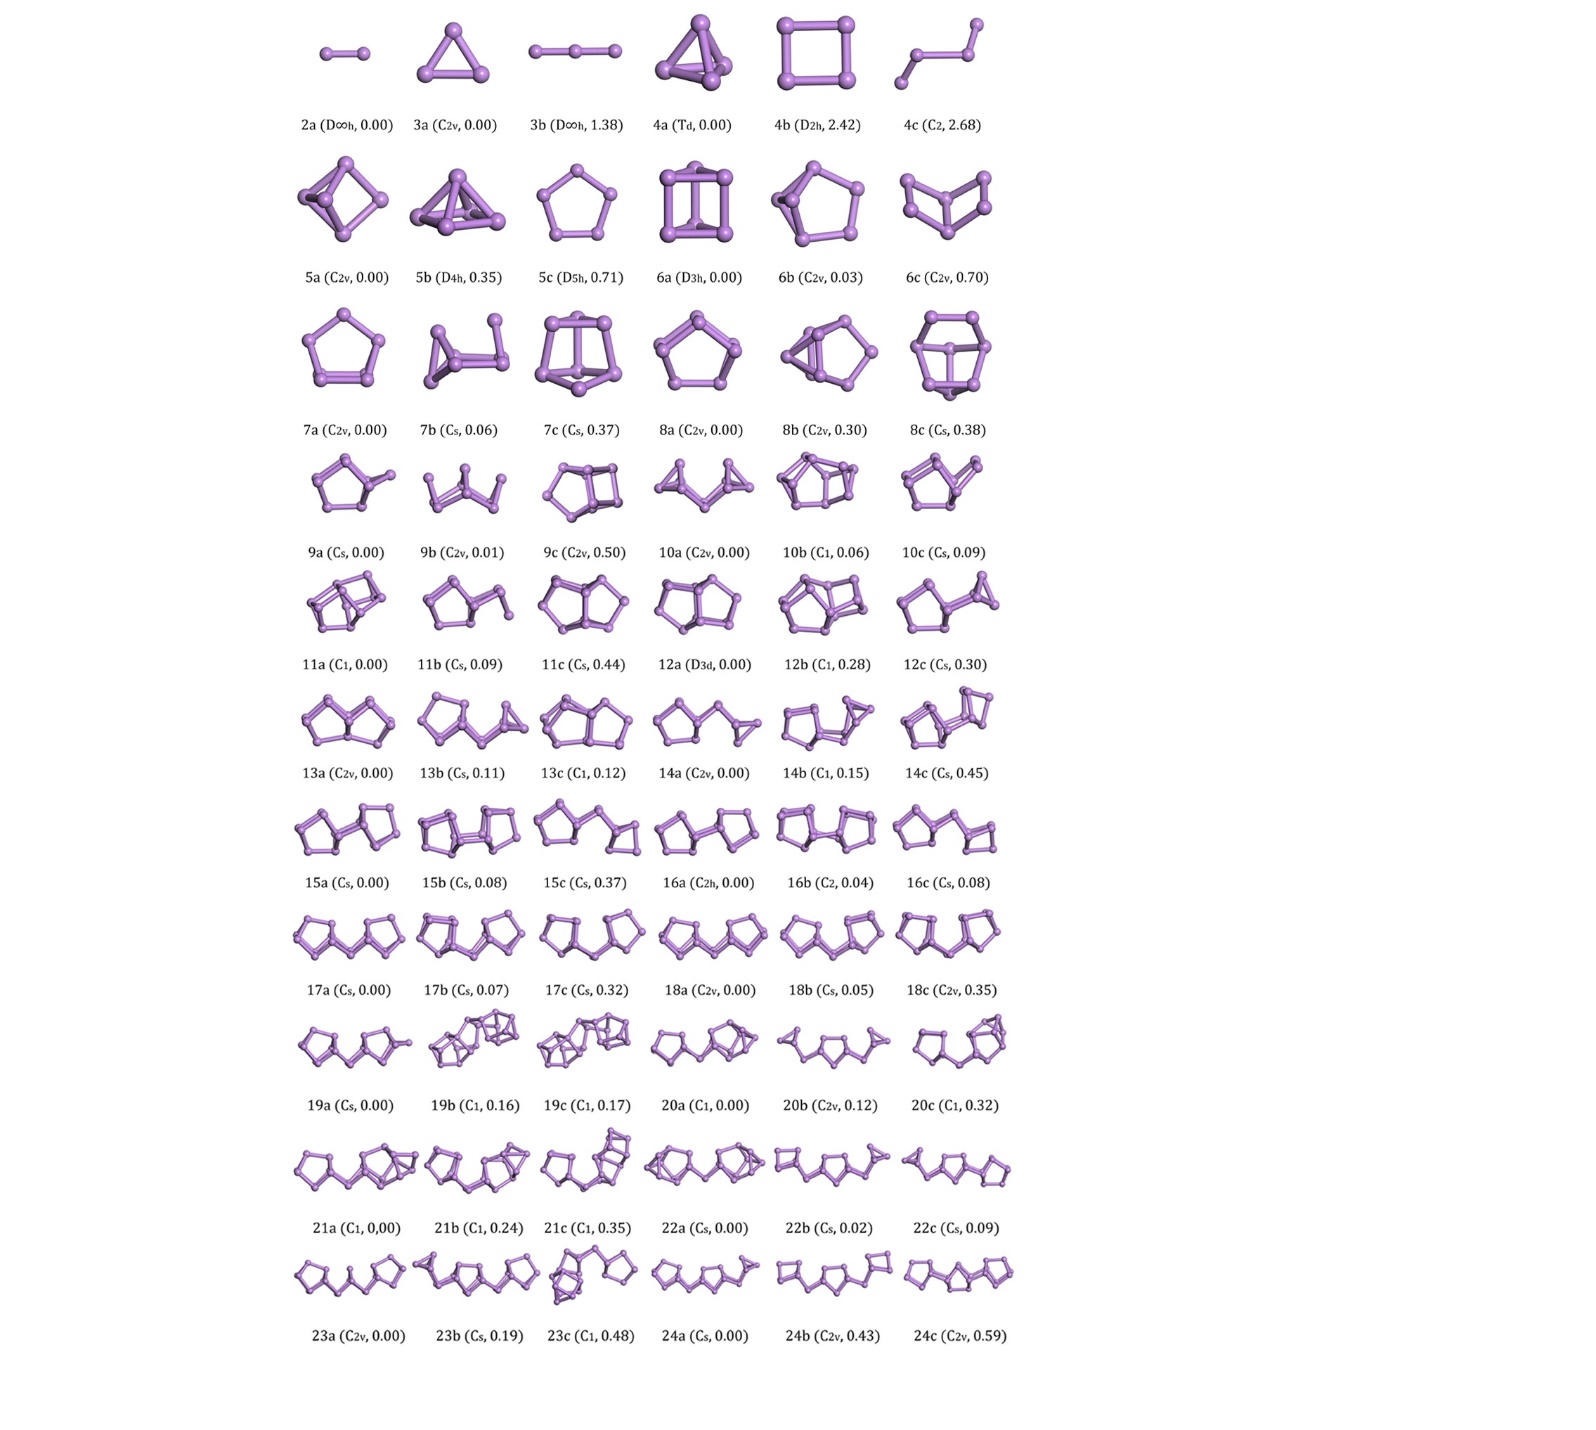


**Figure S1**. Low energy isomers of As*n* (*n*=2–24) neutral clusters.


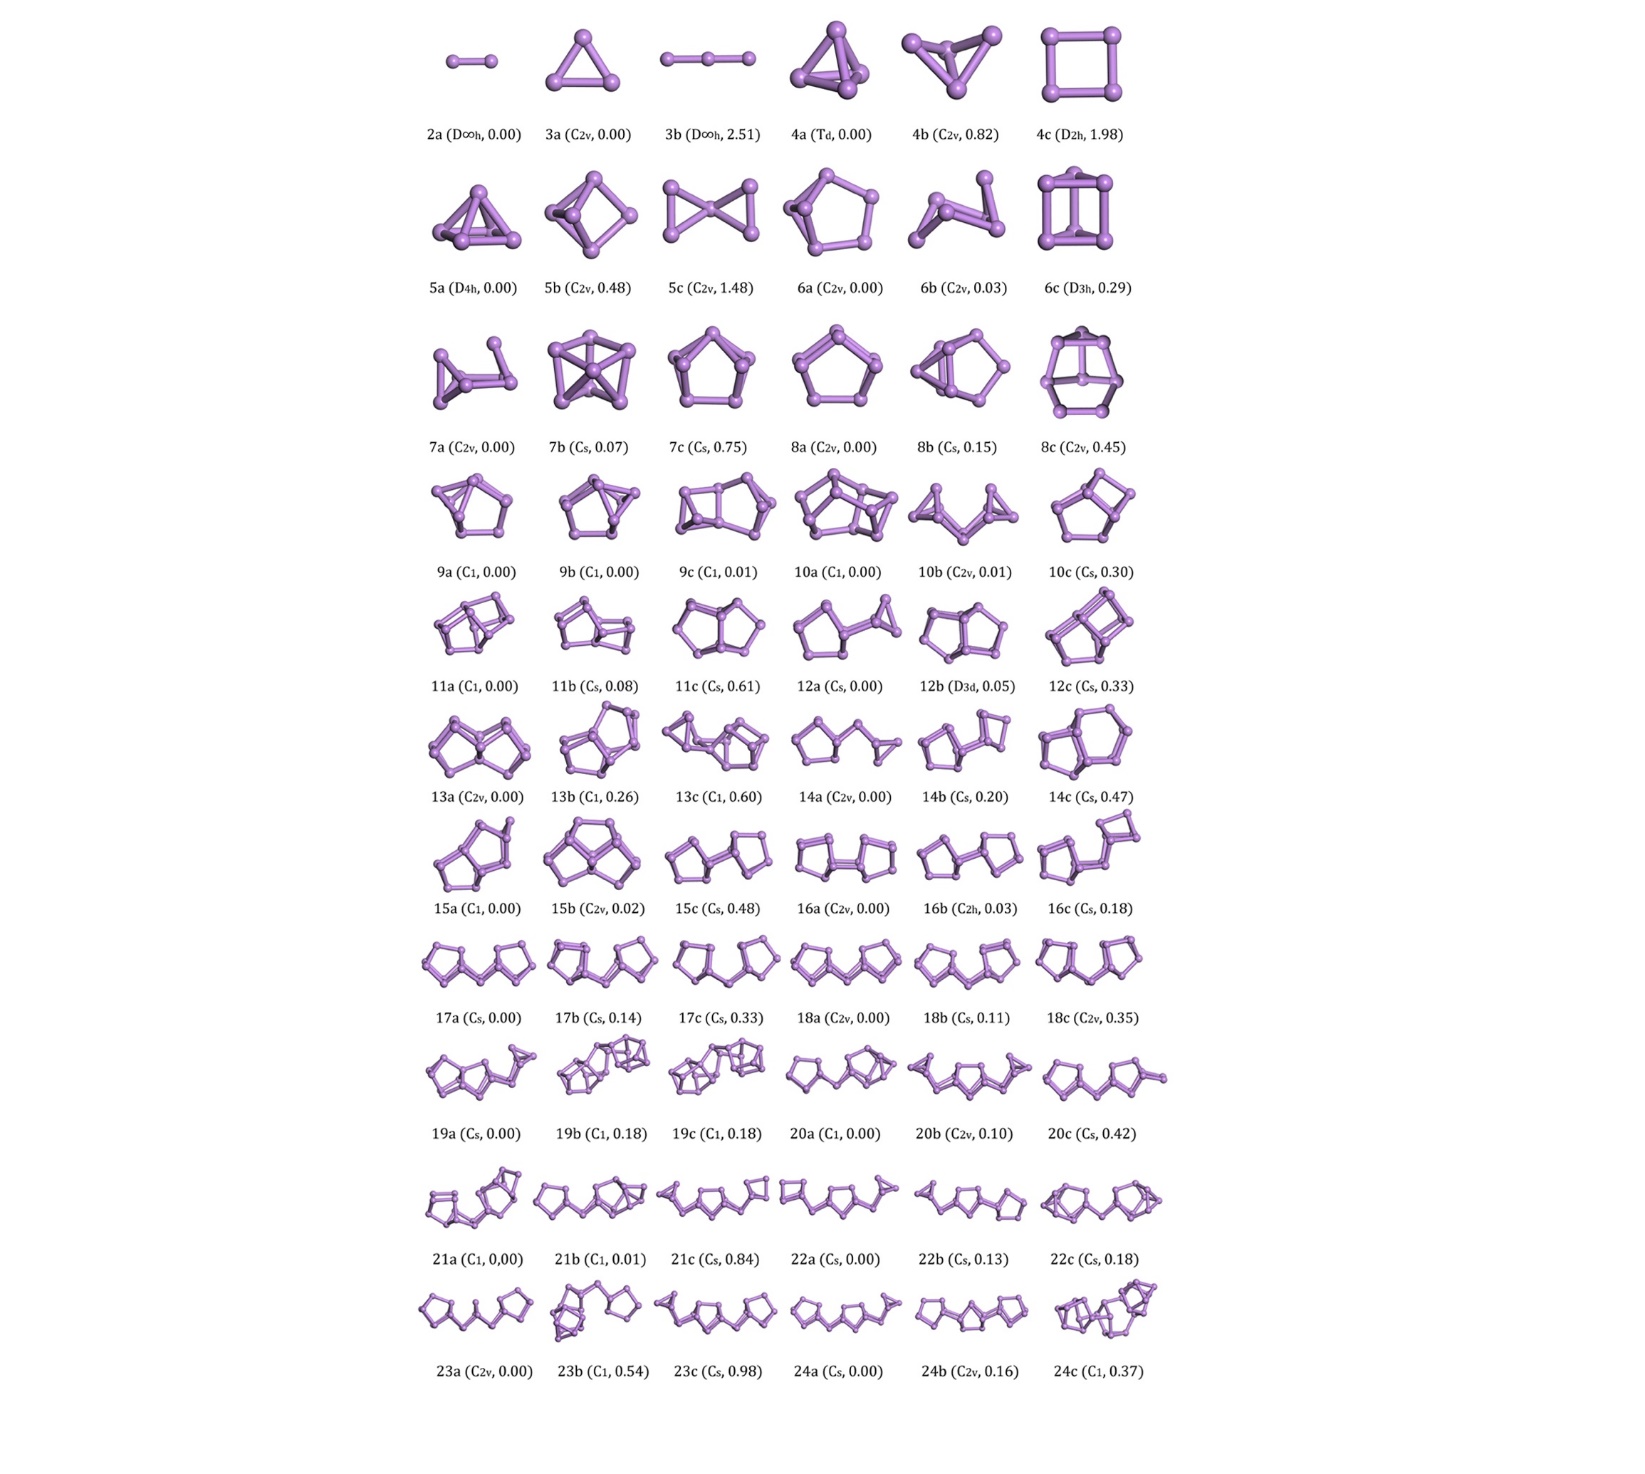


**Figure S2.** Low energy isomers of As+*n* (*n*=2–24) cationic clusters.


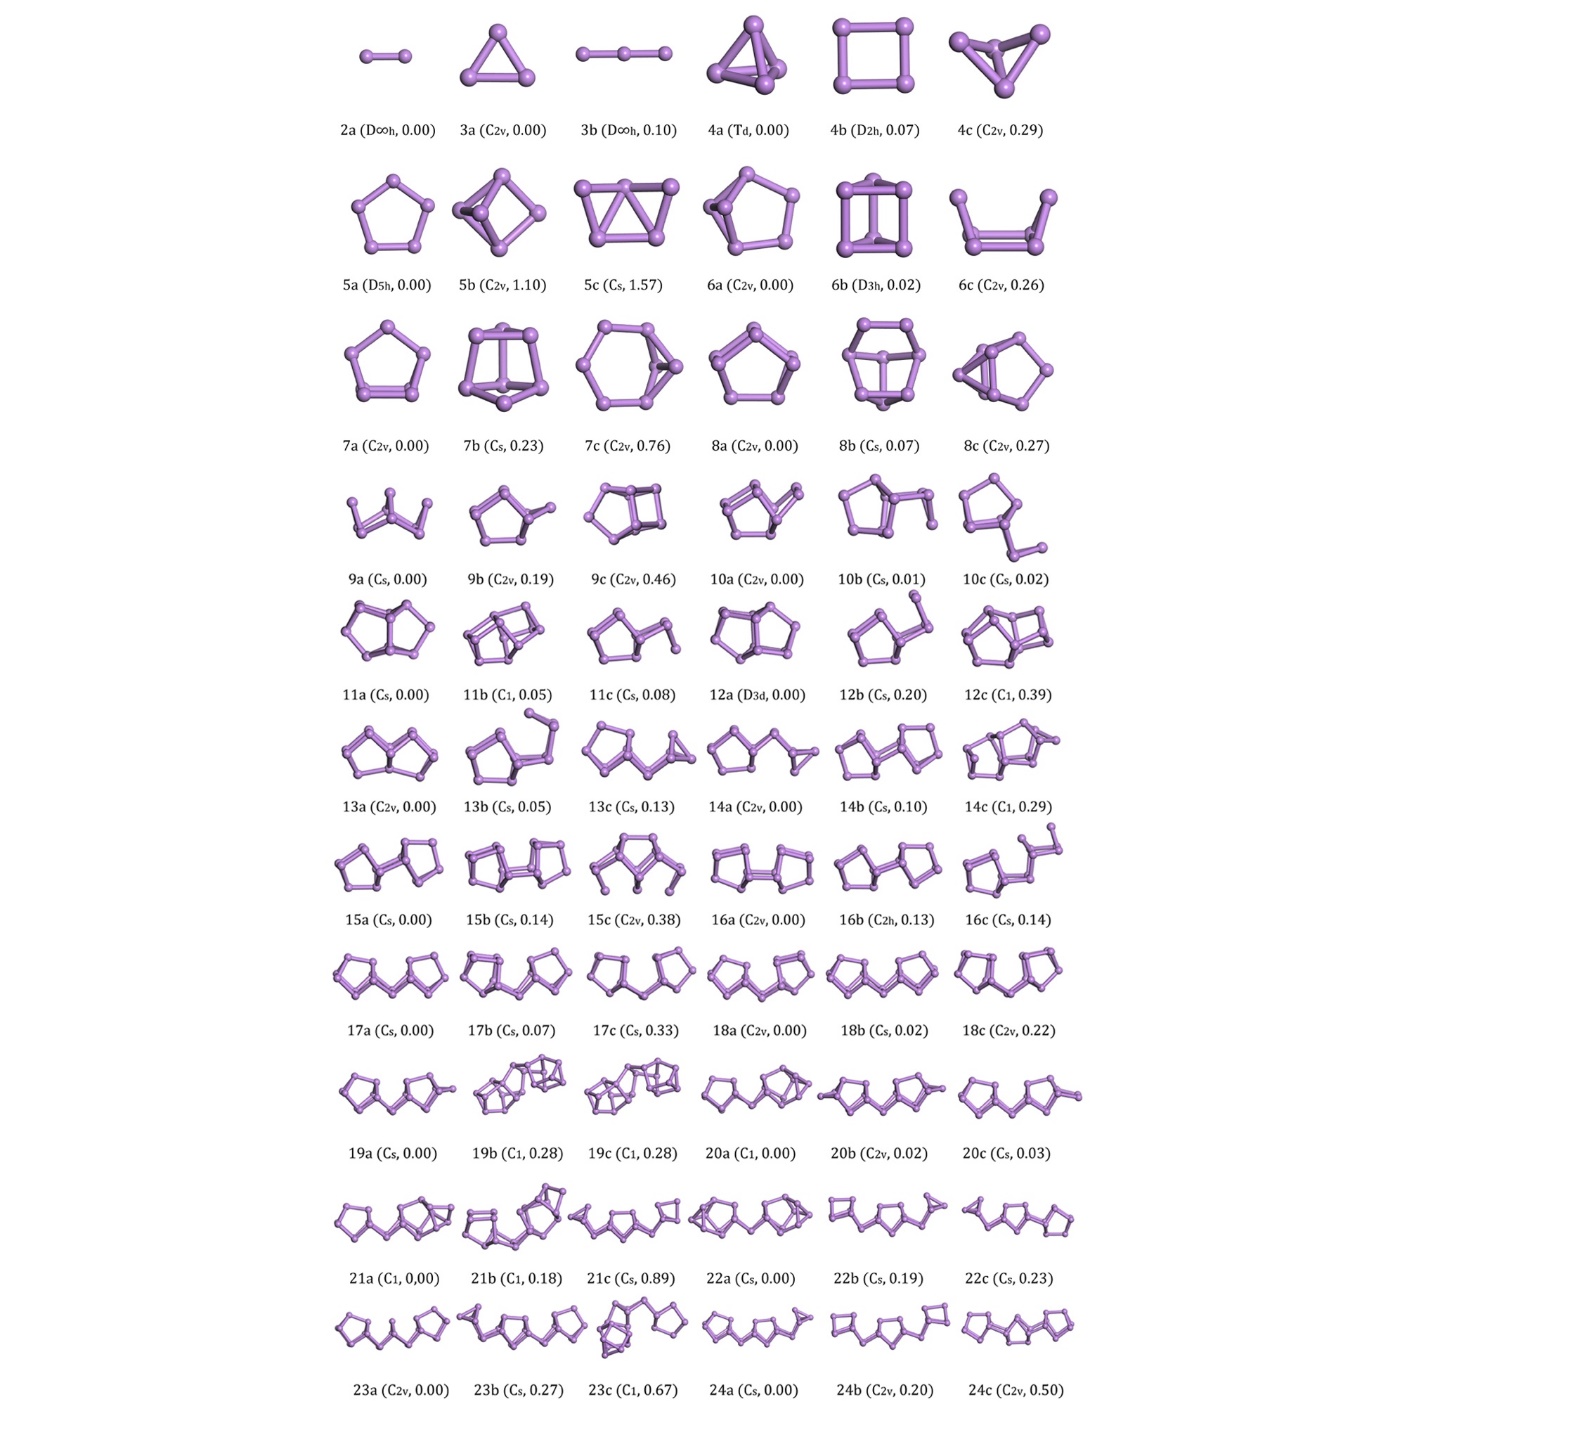


**Figure S3**. Low energy isomers of As-*n* (*n*=2–24) anionic clusters.
